# Supplementary material for: Microfluidic enzymatic DNA extraction on a hybrid polyester-toner-PMMA device
Source: Royal Society of Chemistry journal article supplement (doi:10.1039/c6an00209a), 2016-01-01
Supplement: c6an00209a1.pdf [file c6an00209a1.pdf]

**Supplementary Information for**  
**Microfluidic Enzymatic DNA Extraction on a Hybrid**  
**Polyester-Toner-PMMA Device**

**Brandon L. Thompson<sup>1</sup>‡, Christopher Birch<sup>1</sup>‡, Jingyi Li<sup>1</sup>, Jacquelyn A. DuVall<sup>1</sup>,  
Delphine Le Roux<sup>1</sup>, Daniel A. Nelson<sup>1</sup>, AnChi Tsuei<sup>1</sup>, Daniel L. Mills<sup>2</sup>,  
Shannon T. Krauss<sup>1</sup>, Brian E. Root<sup>3</sup> and James P. Landers<sup>1,4,5</sup>**

Departments of <sup>1</sup>Chemistry, University of Virginia, Charlottesville, VA 22904, USA

<sup>2</sup>TeGrex Technologies, Charlottesville, VA, 22910, USA

<sup>3</sup>Applied Research Institute, University of Virginia, Charlottesville, VA 22904

<sup>4</sup>Mechanical and Aerospace Engineering, and <sup>5</sup>Pathology, University of Virginia,  
Charlottesville, VA 22904

\*To whom correspondence is addressed:

Prof. James Landers  
Department of Chemistry  
University of Virginia  
McCormick Road  
P.O. Box 400319  
Charlottesville, VA 22904  
Ph 434-243-8658  
Fx 434-243-8852  
E-mail: [landers@virginia.edu](mailto:landers@virginia.edu)

## NanoDrop Assay versus qPCR for DNA quantitation from buccal swab samples

**Table 1: NanoDrop versus qPCR DNA quantification. Each swab sample underwent the ZyGEM DNA extraction microdevice protocol and then was quantitated by either NanoDrop fluorospectrometer (n=3) or qPCR (n=2).**

| DNA Quant. Method | Sample 1           | Sample 2           |
|-------------------|--------------------|--------------------|
| qPCR              | 2.30 ± 0.039 ng/μL | 3.13 ± 0.145 ng/μL |
| NanoDrop          | 2.76 ± 0.456 ng/μL | 3.61 ± 0.088 ng/μL |
